# Supplementary material for: Construction of a novel fluorescent probe for sensitive determination of glyphosate in food and imaging living cells
Source: Royal Society of Chemistry journal article supplement (doi:10.1039/d4ay00380b), 2024-01-01
Supplement: d4ay00380b1.pdf [file d4ay00380b1.pdf]

## **Supplementary Information**

### **A Novel Fluorescent Probe Construction for Sensitive Determination of Glyphosate in Food and Imaging Living Cells**

Xiaoping Lin, Taiyi Chen, Jiayun Hu, Xiaoqiong Mao, Mengqing Liu\*, Rongying Zeng, Qingmei Zhong, Wen Chen\*

Hunan Engineering Research Center for Monitoring and Treatment of Heavy Metal Pollution in the Upper Reaches of Xiangjiang River, College of Chemistry and Material Science, Hengyang Normal University, Hengyang, 421001, P. R. China

\*Corresponding author.

E-mail: wenchen@hnu.edu.cn; liumengqin2013@163.com

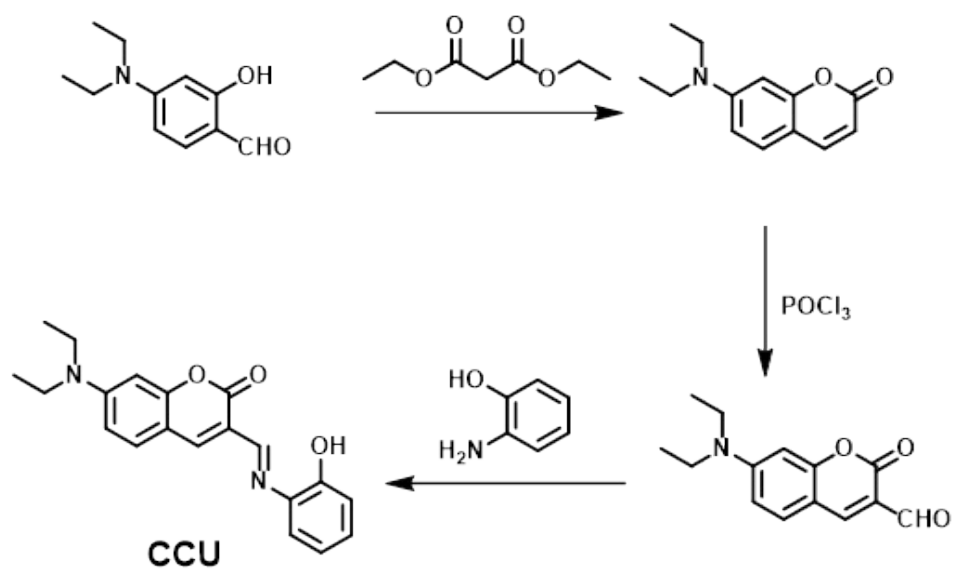

Scheme S1. The synthesis route of CCU

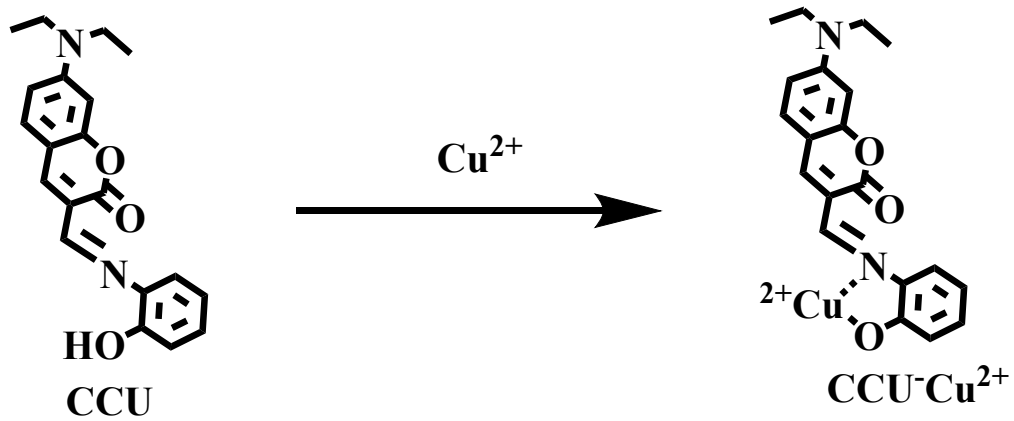

Scheme S2. Possible mechanism of CCU and  $\text{Cu}^{2+}$

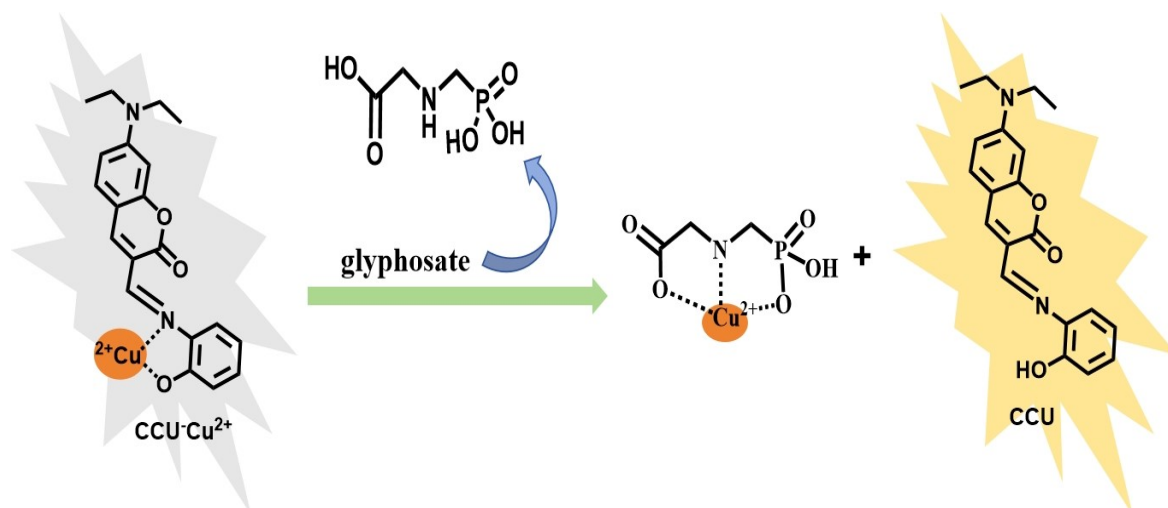

Scheme S3. Possible mechanism of  $\text{CCU-Cu}^{2+}$  and glyphosate

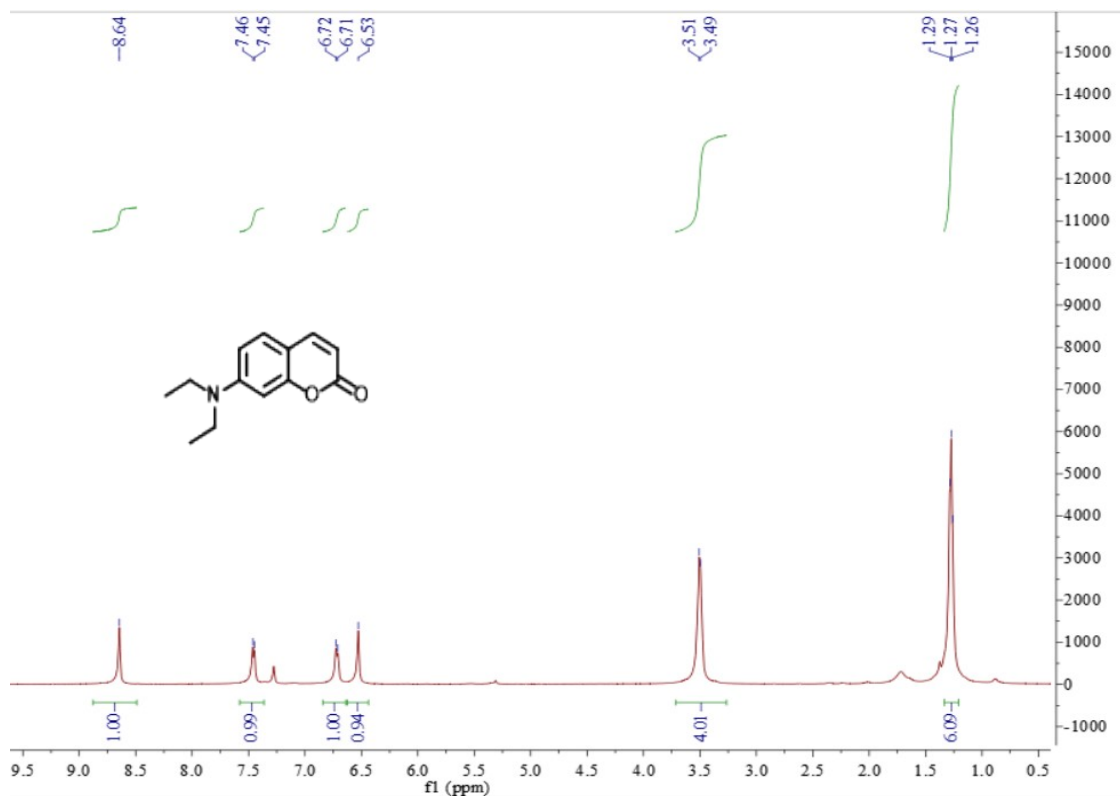

Fig.S1  $^1\text{H}$  NMR spectra of 7-(diethylamino)-2H-chromen-2-one

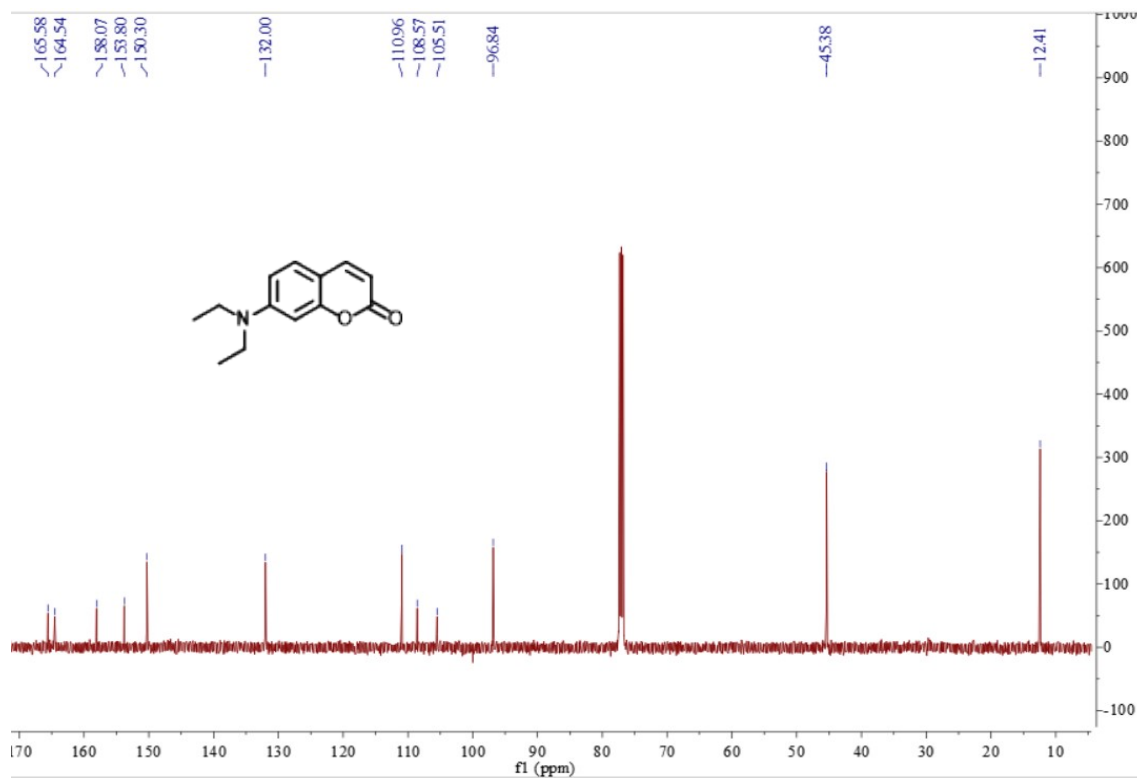

Fig.S2  $^{13}\text{C}$  NMR spectra of 7-(diethylamino)-2H-chromen-2-one

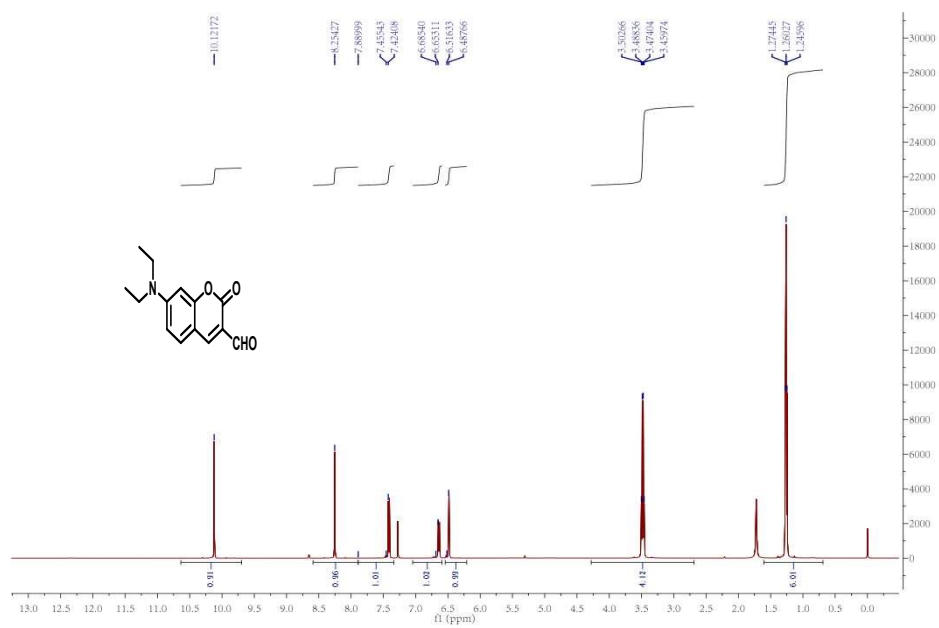

Fig. S3  $^1\text{H}$  NMR spectra of 7(diethylamino)-coumarin-3-carbaldehyde

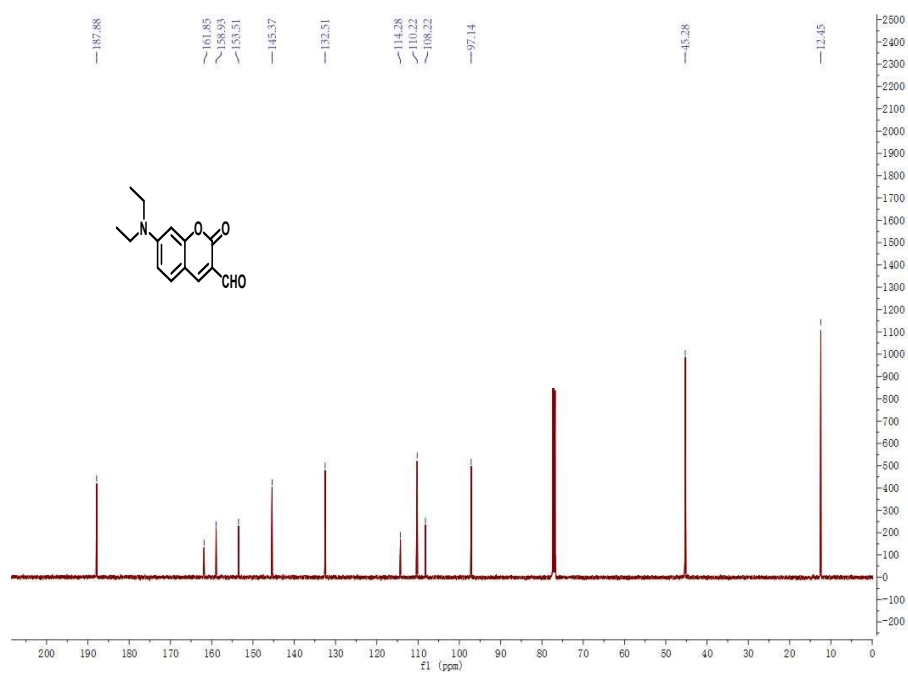

Fig. S4  $^{13}\text{C}$  NMR spectra of 7(diethylamino)-coumarin-3-carbaldehyde

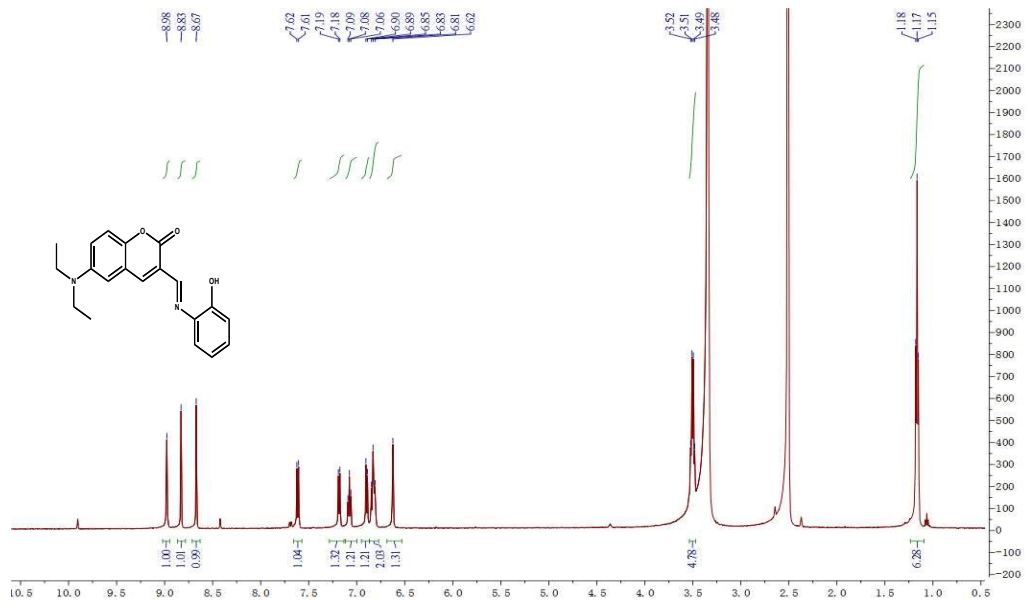

Fig. S5  $^1\text{H}$  NMR spectra of CCU

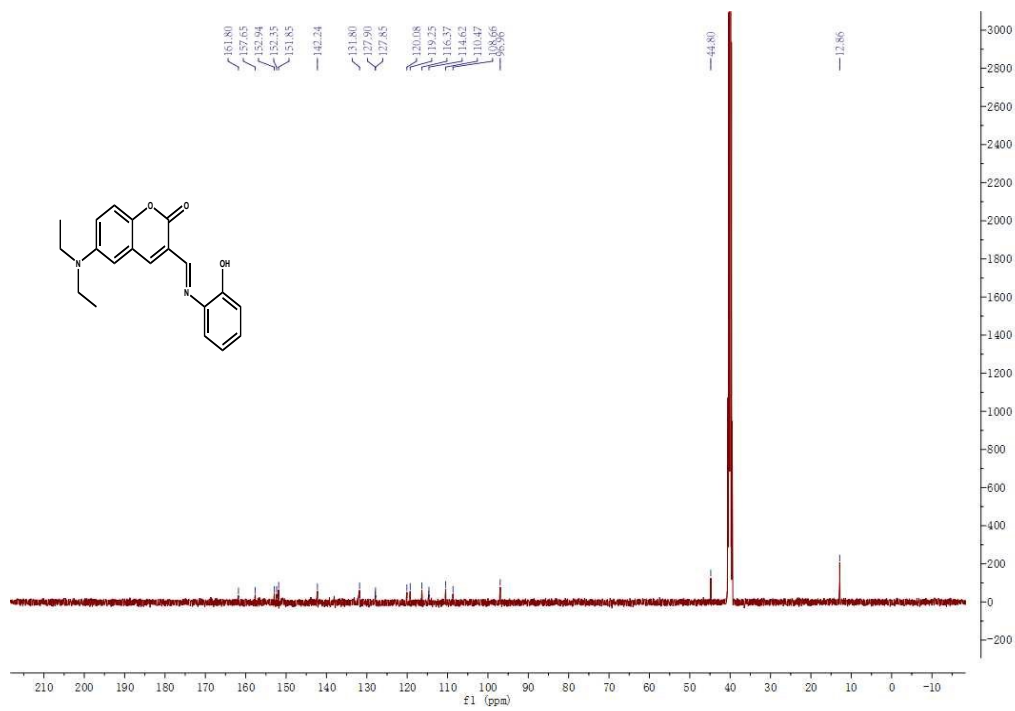

Fig. S6  $^{13}\text{C}$  NMR spectra of CCU

245 #1 RT: 0.00 AV: 1 NL: 1.79E6  
T: + c ESI Full ms [50.00-450.00]

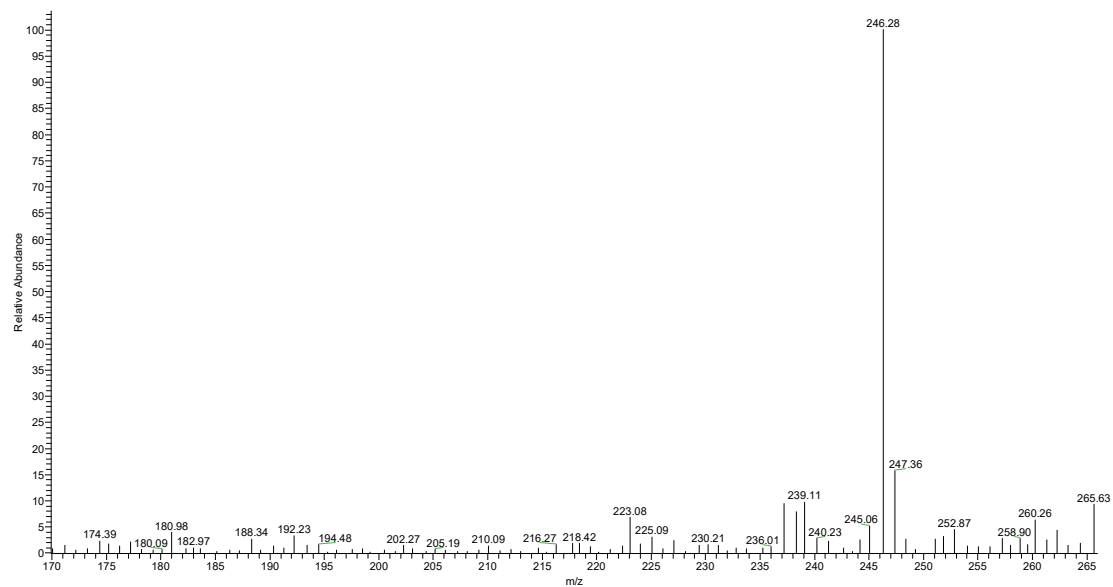

Fig. S7 ESI-MS spectrum of 7(diethylamino)-coumarin-3-carbaldehyde.

336 230722170027 #60 RT: 0.97 AV: 1 NL: 2.74E6  
T: + c ESI Full ms [100.00-1000.00]

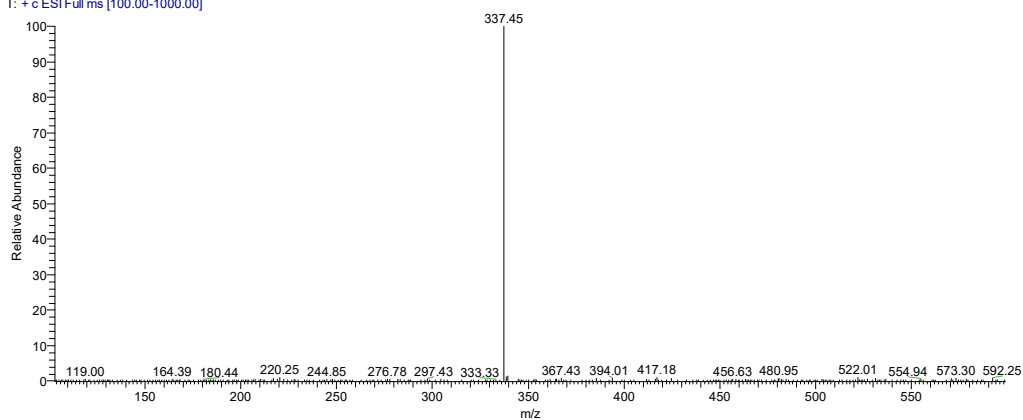

Fig. S8 ESI-MS spectrum of CCU



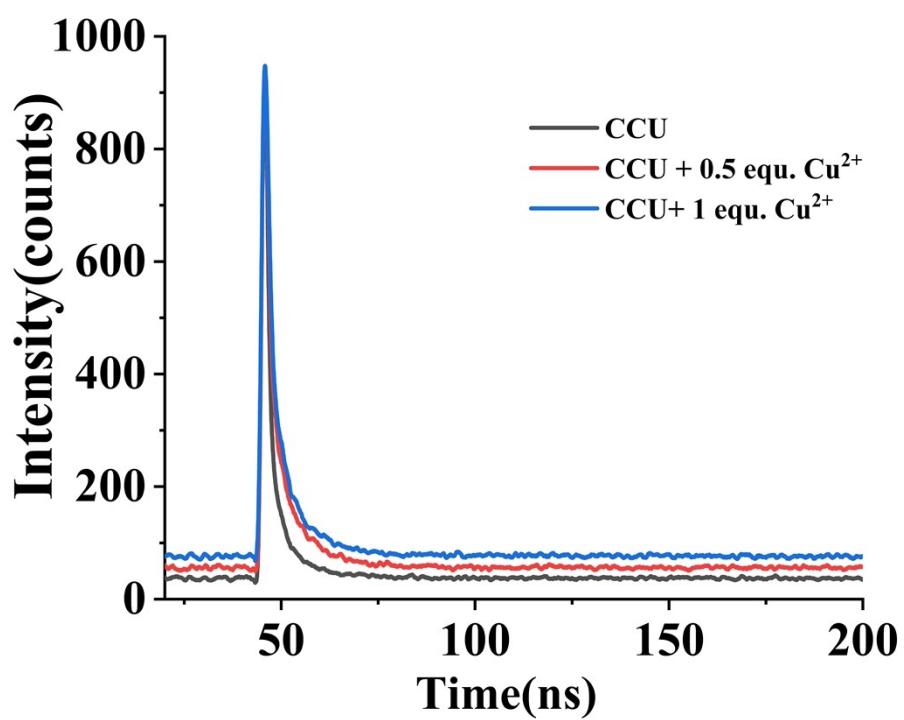

*Fig.S9 Fluorescence lifetime of CCU (10  $\mu$ M) with Cu<sup>2+</sup> (0–1 equiv)*

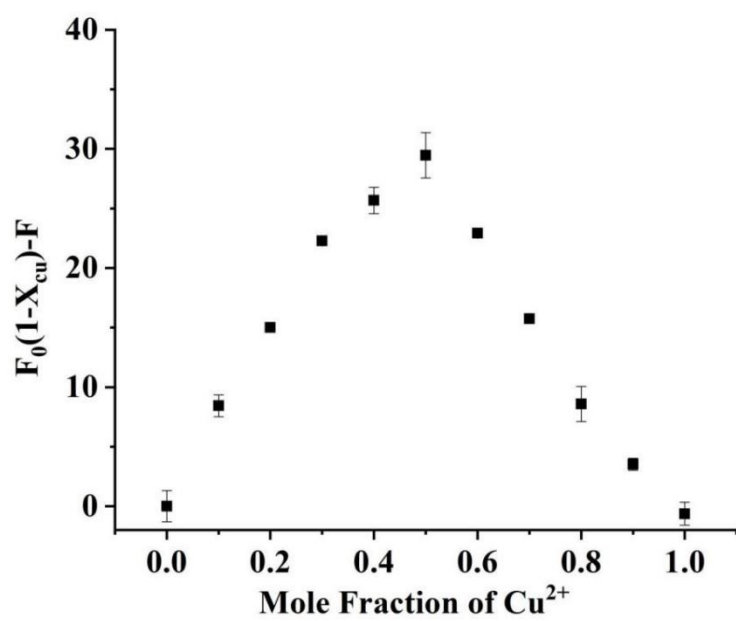

Fig. S10 Job's plot for CCU and  $Cu^{2+}$  (The total concentration of CCU and  $Cu^{2+}$  is 10  $\mu M$ ,  $\lambda_{em} = 500$  nm).

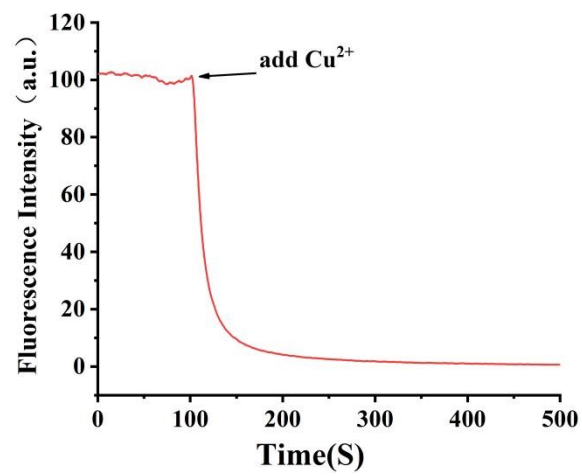

Figure S11 Real-time fluorescence responses of CCU (10 μM) to Cu<sup>2+</sup>(100 μM) in PBS (10% DMSO,  $\lambda_{em}$ = 500 nm)

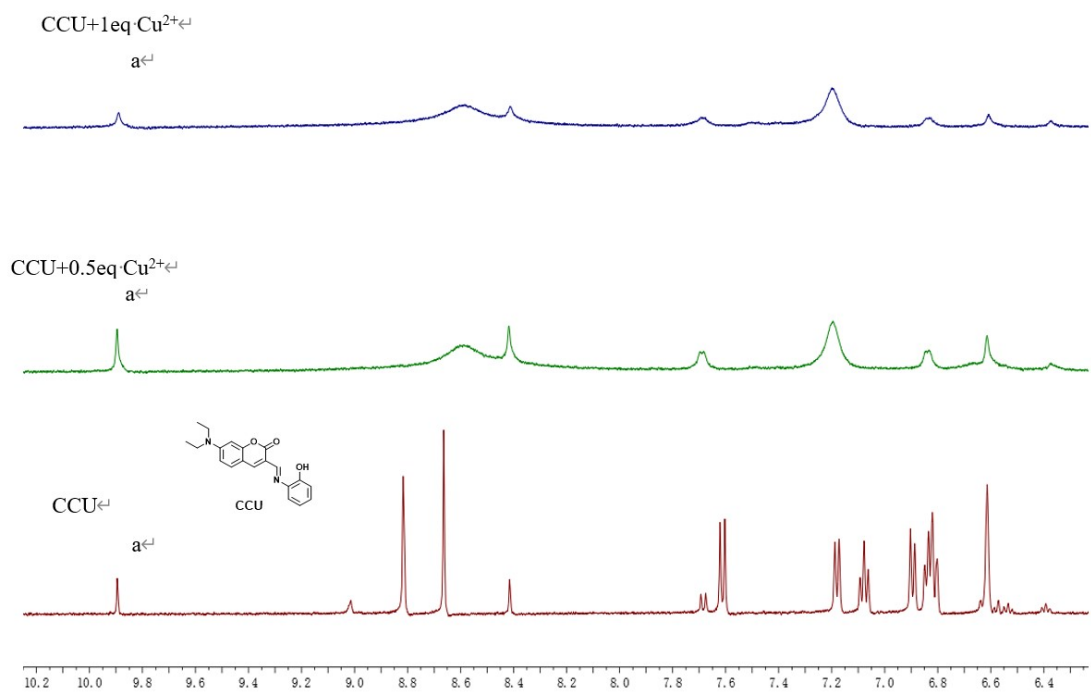

Figure S12 <sup>1</sup>H NMR titration plots of CCU with Cu<sup>2+</sup> (a: OH).

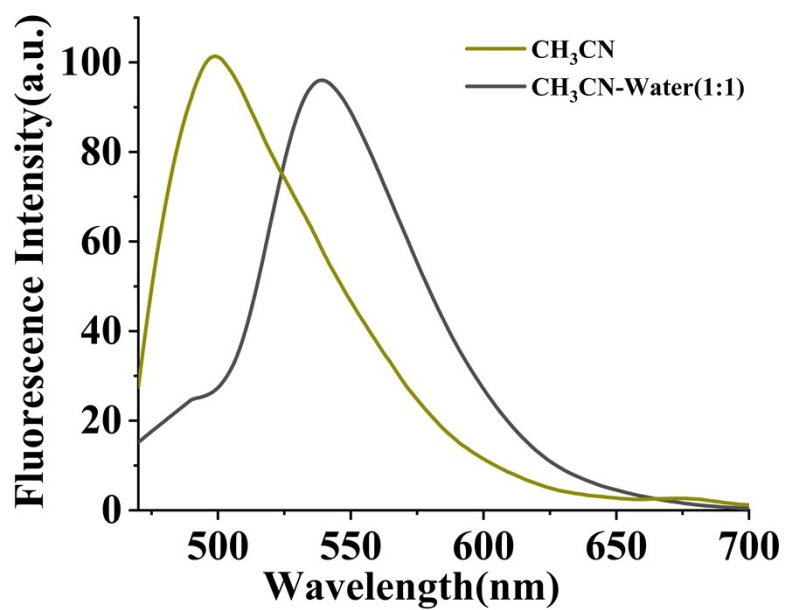

*Fig. S13 The fluorescence intensity of CCU in acetonitrile (CH<sub>3</sub>CN) or CH<sub>3</sub>CN-Water (1:1).*

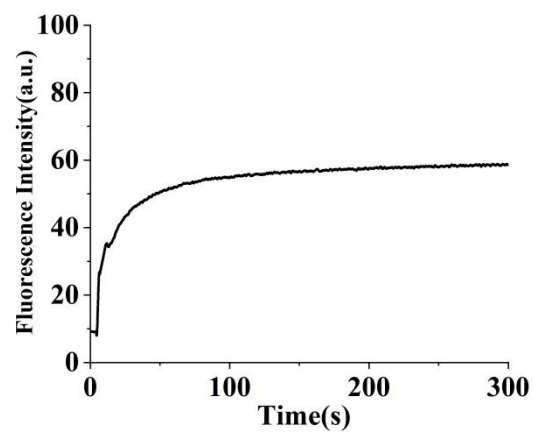

Fig.14 Real-time fluorescence responses of CCU (10 μM) to glyphosate (50 μM) in PBS (10% DMSO,  $\lambda_{em}$  = 500 nm).

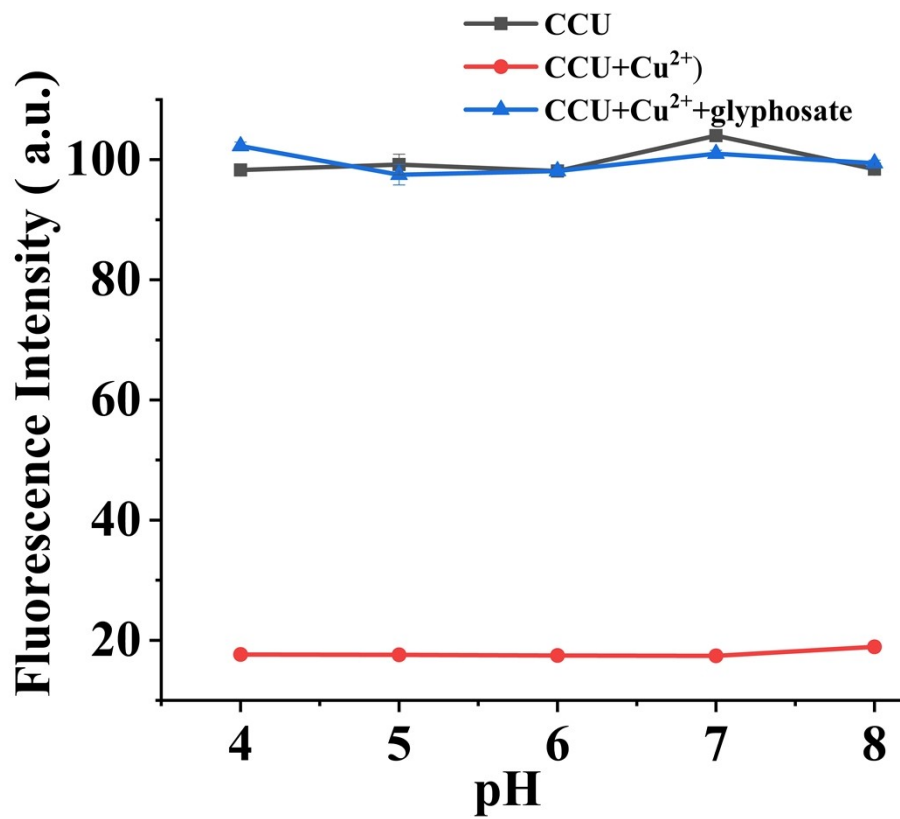

*Fig. S15 Fluorescence intensity at 500 nm for CCU with or without Cu<sup>2+</sup> or glyphosate in buffers with different pH values.*

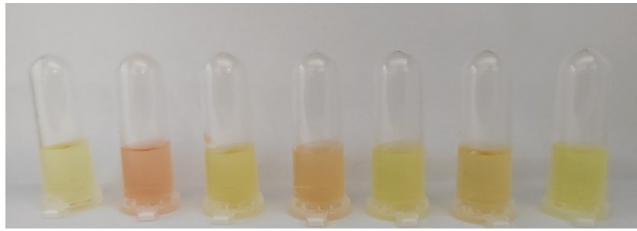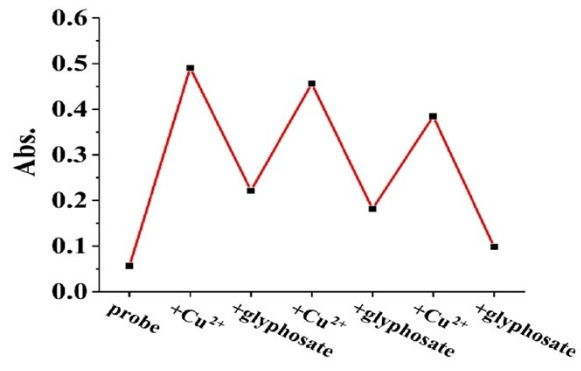

*Fig.16 Reversible interaction between CCU with Cu<sup>2+</sup> and glyphosate ( $\lambda_{abs}=500$  nm).*



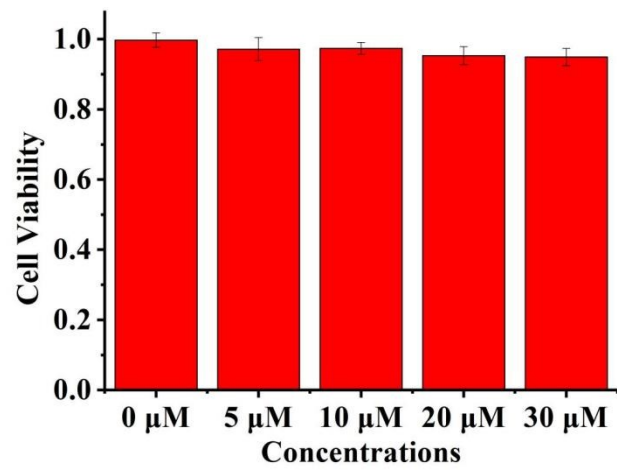

**Figure S17** Cell viability assay for CCU as measured by WST-8 assay.

Table S1 Summary of glyphosate fluorescent probes reported in the last three years

| Names/Material <sup>↵</sup>        | Response time <sup>↵</sup> | Test Condition <sup>↵</sup>                                                 | Applications <sup>↵</sup>                                      | Ref <sup>↵</sup>                                                                           |
|------------------------------------|----------------------------|-----------------------------------------------------------------------------|----------------------------------------------------------------|--------------------------------------------------------------------------------------------|
| NPA-Cu <sup>2+</sup> <sup>↵</sup>  | 300 s <sup>↵</sup>         | CH <sub>3</sub> CN solution <sup>↵</sup>                                    | Real samples <sup>↵</sup>                                      | Int. J. Mol. Sci., <b>2021</b> , 22,<br>9816. <sup>↵</sup>                                 |
| <sup>↵</sup>                       | <sup>↵</sup>               | <sup>↵</sup>                                                                | <sup>↵</sup>                                                   | <sup>↵</sup>                                                                               |
| R-G <sup>↵</sup>                   | 120 s <sup>↵</sup>         | H <sub>2</sub> O/CH <sub>3</sub> OH (20% or<br>purified water) <sup>↵</sup> | Real samples <sup>↵</sup>                                      | Talanta, 224, <b>2021</b> ,<br>121834. <sup>↵</sup>                                        |
| <sup>↵</sup>                       | <sup>↵</sup>               | <sup>↵</sup>                                                                | <sup>↵</sup>                                                   | <sup>↵</sup>                                                                               |
| BHMH-Fe <sup>3+</sup> <sup>↵</sup> | / <sup>↵</sup>             | DMSO/HEPES (25%,<br>pH=6.0) <sup>↵</sup>                                    | Real samples <sup>↵</sup><br>and cells imaging <sup>↵</sup>    | J. Agric. Food Chem.<br><b>2021</b> , 69, 12661-12673. <sup>↵</sup>                        |
| <sup>↵</sup>                       | <sup>↵</sup>               | <sup>↵</sup>                                                                | <sup>↵</sup>                                                   | <sup>↵</sup>                                                                               |
| PHQA-Cu <sup>2+</sup> <sup>↵</sup> | / <sup>↵</sup>             | Deionized water <sup>↵</sup>                                                | Real samples <sup>↵</sup>                                      | Food Chem., 447, <b>2024</b> ,<br>138859. <sup>↵</sup>                                     |
| <sup>↵</sup>                       | <sup>↵</sup>               | <sup>↵</sup>                                                                | <sup>↵</sup>                                                   | <sup>↵</sup>                                                                               |
| PHA-Cu <sup>2+</sup> <sup>↵</sup>  | <sup>↵</sup>               | DMSO/H <sub>2</sub> O (10%) <sup>↵</sup>                                    | Cells imaging <sup>↵</sup>                                     | Spectrochim. Acta. A Mol.<br>Biomol. Spectrosc., 304,<br><b>2024</b> , 123291 <sup>↵</sup> |
| <sup>↵</sup>                       | / <sup>↵</sup>             | <sup>↵</sup>                                                                | <sup>↵</sup>                                                   | <sup>↵</sup>                                                                               |
| <sup>↵</sup>                       | <sup>↵</sup>               | <sup>↵</sup>                                                                | <sup>↵</sup>                                                   | <sup>↵</sup>                                                                               |
| F-0 <sup>↵</sup>                   | 1800 s <sup>↵</sup>        | PBS (7.2-7.4) <sup>↵</sup>                                                  | Real samples <sup>↵</sup>                                      | Anal. Methods, <b>2024</b> , 16,<br>1341-1346 <sup>↵</sup>                                 |
| <sup>↵</sup>                       | <sup>↵</sup>               | <sup>↵</sup>                                                                | <sup>↵</sup>                                                   | <sup>↵</sup>                                                                               |
| PDHN-Cu <sup>2+</sup> <sup>↵</sup> | 60 s <sup>↵</sup>          | Buffer pH=7.0 <sup>↵</sup>                                                  | Real samples <sup>↵</sup>                                      | Food Chem., 448, <b>2024</b> ,<br>139021 <sup>↵</sup>                                      |
| <sup>↵</sup>                       | <sup>↵</sup>               | <sup>↵</sup>                                                                | <sup>↵</sup>                                                   | <sup>↵</sup>                                                                               |
| QL <sup>↵</sup>                    | / <sup>↵</sup>             | DMSO <sup>↵</sup>                                                           | Real samples <sup>↵</sup>                                      | Spectrochim. Acta. A Mol.<br>Biomol. Spectrosc., 303,<br><b>2023</b> , 123221 <sup>↵</sup> |
| <sup>↵</sup>                       | <sup>↵</sup>               | <sup>↵</sup>                                                                | <sup>↵</sup>                                                   | <sup>↵</sup>                                                                               |
| <sup>↵</sup>                       | <sup>↵</sup>               | <sup>↵</sup>                                                                | <sup>↵</sup>                                                   | <sup>↵</sup>                                                                               |
| 1•Cu <sup>2+</sup> <sup>↵</sup>    | / <sup>↵</sup>             | THF-Water (50%) <sup>↵</sup>                                                | Real samples <sup>↵</sup><br>and cells imaging <sup>↵</sup>    | New J. Chem., <b>2022</b> , 46,<br>8105-8111 <sup>↵</sup>                                  |
| <sup>↵</sup>                       | <sup>↵</sup>               | <sup>↵</sup>                                                                | <sup>↵</sup>                                                   | <sup>↵</sup>                                                                               |
| CCU-Cu <sup>2+</sup> <sup>↵</sup>  | 50 s <sup>↵</sup>          | PBS(pH=7.4, DMSO,<br>10%) <sup>↵</sup>                                      | Real samples,<br>smartphones and<br>cells imaging <sup>↵</sup> | <b>This work</b> <sup>↵</sup><br><sup>↵</sup>                                              |
| <sup>↵</sup>                       | <sup>↵</sup>               | <sup>↵</sup>                                                                | <sup>↵</sup>                                                   | <sup>↵</sup>                                                                               |
